# Supplementary material for: An isotope dilution approach for validating the output of mercury gas generators for mercury pollution monitoring
Source: Royal Society of Chemistry journal article supplement (doi:10.1039/d4ja00373j), 2025-01-01
Supplement: d4ja00373j1.xlsx [file d4ja00373j1.xlsx]

## Sheet: Overview
Flow IDMS Calculation Overview
Date of Calculation	2022-09-02
Date of Analysis	2022-09-01
Analyst(s)	SP
Generator	PSA 10.534 (high-level Hg0)
Detector	ICP-MS06
CV	Cetac HGX-200
Peripump	ICP-MS06 peripump
Mass Flow Meter	Drycal Pro Flexcal (S/N 175689)
Set-up	Panayot's Flow IDMS set-up
Gen Flow Settings	1.5 L/min dilution flow + 1 mL/min reservoir flow
Temp (°C)	35.2
Press(hPa)	1027.1
Dumarey Conc (ng/L) measured flow rate	19.96
Dumarey Conc (ng/L) flow setting	30.38
Measured Conc (ng/L)	34.0337
Measured/Calc Ratio	1.12027

## Sheet: Calculation template
	Type (measured/calc)	Term	Anotation	Unit	Value	Uncertainty
							Spike Mass Flow 199Hg	Volumetric flow (split-flow)	natHg Atomic weight	199Hg Atomic weight	enrHg Atom fraction199Hg	natHg Atom fraction202Hg	Blend IR (202/199)	199Hg IR (202/199)	natHg IR (199/202)
ü	calculated	Spike Mass Flow 199Hg	MFt_e	[pg min-1]	1053.91	30.6862	1084.6	1053.91	1053.91	1053.91	1053.91	1053.91	1053.91	1053.91	1053.91
ü	calculated	Volumetric flow (split-flow)	Vf	[sl min-1]	0.226777	0.00582925	0.226777	0.232607	0.226777	0.226777	0.226777	0.226777	0.226777	0.226777	0.226777
ü	cert (IUPAC website)	natHg Atomic weight	Aw(Hg_n)	g mol-1	200.592	0.0015	200.592	200.592	200.594	200.592	200.592	200.592	200.592	200.592	200.592
ü	calculated	199Hg Atomic weight	Aw(Hg_e)	g mol-1	199.081	0.13352	199.081	199.081	199.081	199.215	199.081	199.081	199.081	199.081	199.081
ü	cert	enrHg Atom fraction199Hg	A(199Hg)_e	%	91.95	0.05	91.95	91.95	91.95	91.95	92	91.95	91.95	91.95	91.95
ü	cert (IUPAC website)	natHg Atom fraction202Hg	A(202Hg)_n	%	29.74	0.13	29.74	29.74	29.74	29.74	29.74	29.87	29.74	29.74	29.74
ext file checked ü	measured	Blend IR (202/199)	Rb(202Hg/199Hg)	mol mol-1	1.00842	0.00710007	1.00842	1.00842	1.00842	1.00842	1.00842	1.00842	1.01552	1.00842	1.00842
ü	calculated	199Hg IR (202/199)	Re(202Hg/199Hg)	mol mol-1	0.0079391	0.00010884	0.0079391	0.0079391	0.0079391	0.0079391	0.0079391	0.0079391	0.0079391	0.00804794	0.0079391
ü	calculated	natHg IR (199/202)	Rn(199Hg/202Hg)	mol mol-1	0.569603	0.00474135	0.569603	0.569603	0.569603	0.569603	0.569603	0.569603	0.569603	0.569603	0.574345
	measured by JSI (Dec 2022)	Cold Vapour Efficiency	CVE		0.99652	0.000231084	0.99652	0.99652	0.99652	0.99652	0.99652	0.99652	0.99652	0.99652	0.99652	0.996751
ü	calculated	Generator mass flow (natHg)	MFgen	ng m-3 (=pg/L)	34033.7	1485.61	35024.6	33180.8	34033.9	34010.8	34052.2	33885.5	34604	34029.9	34420.3
					RSU	0.0436512
							Spike Mass Flow 199Hg	Volumetric flow (split-flow)	natHg Atomic weight	199Hg Atomic weight	enrHg Atom fraction199Hg	natHg Atom fraction202Hg	Blend IR (202/199)	199Hg IR (202/199)	natHg IR (199/202)
						Squared deviations	981963	727440	0.0647698	520.316	342.495	21939.8	325295	13.7081	149526
						Uncertainty Budget	0.444923	0.3296	2.93469e-08	0.000235753	0.000155183	0.00994084	0.14739	6.21108e-06	0.0677497
		Term	Anotation	Unit	Value	Uncertainty
ü	calculated (external)	enrHg mass fraction	W(199Hg)	pg g-1	4182.19	41.793
ü	cert	enrHg Atom fraction 196Hg	A(196Hg)_e	%	0.02	0.02
ü	cert	enrHg Atom fraction 198Hg	A(198Hg)_e	%	1.63	0.02
ü	cert	enrHg Atom fraction 200Hg	A(200Hg)_e	%	4.92	0.03
ü	cert	enrHg Atom fraction 201Hg	A(201Hg)_e	%	0.66	0.01
ü	cert	enrHg Atom fraction 202Hg	A(202Hg)_e	%	0.73	0.01
ü	cert	enrHg Atom fraction 204Hg	A(204Hg)_e	%	0.11	0.01
ü	cert (IUPAC website)	natHg Atom fraction199Hg	A(199Hg)_n	%	16.94	0.12
ü	measured	Total Gen flow	F(Gen_tot)	[sl min-1]	2.26527	0.00451526
ü	measured	Waste Gen Flow	F(Gen_exh)	[sl min-1]	2.03849	0.00368681
ü	measured	Peri Pump flow	F(PP)	[g min-1]	0.25288	0.00691549
				ü	(difference)2		Spike Mass Flow 199Hg	Volumetric flow (split-flow)	natHg Atomic weight	199Hg Atomic weight	enrHg Atom fraction199Hg	natHg Atom fraction202Hg	Blend IR (202/199)	199Hg IR (202/199)	natHg IR (199/202)
				ü		199Hg Atomic weight	0	0	0	0.0178276	0	0	0	0	0
				ü		natHg IR (199/202)	0	0	0	0	0	0	0	0	2.24804e-05
				ü		199Hg IR (202/199)	0	0	0	0	0	0	0	1.18462e-08	0
				ü		Spike Mass Flow 199Hg	941.644	0	0	0	0	0	0	0	0
				ü		Valumetric flow (split-flow)	0	3.39801e-05	0	0	0	0	0	0	0
				ü		Generator mass flow (natHg)	981963	727440	0.0647698	520.316	342.495	21939.8	325295	13.7081	149526
				ü	budget		Spike Mass Flow 199Hg	Volumetric flow (split-flow)	natHg Atomic weight	199Hg Atomic weight	enrHg Atom fraction199Hg	natHg Atom fraction202Hg	Blend IR (202/199)	199Hg IR (202/199)	natHg IR (199/202)
				ü		199Hg Atomic weight	0	0	0	1	0	0	0	0	0
				ü		natHg IR (199/202)	0	0	0	0	0	0	0	0	1
				ü		199Hg IR (202/199)	0	0	0	0	0	0	0	1	0
				ü		Spike Mass Flow 199Hg	1	0	0	0	0	0	0	0	0
				ü		Valumetric flow (split-flow)	0	1	0	0	0	0	0	0	0
				ü		Generator mass flow (natHg)	0.444923	0.3296	2.93469e-08	0.000235753	0.000155183	0.00994084	0.14739	6.21108e-06	0.0677497
	Auto updating table from the website
	Atomic mass (Da)	Isotopic abundance (amount fraction)
ü	195.965 83(2)	0.0015(1)
ü	197.966 769(3)	0.1004(3)
ü	198.968 281(4)	0.1694(12)
ü	199.968 327(4)	0.2314(9)
ü	200.970 303(5)	0.1317(9)
ü	201.970 644(5)	0.2974(13)
ü	203.973 494(3)	0.0682(4)
			ü
			ü
			ü
			ü
			ü
			ü
			ü
			ü
			ü

## Sheet: Peripump MassFlow
Peripump Massflow Determination
Date	2022-09-02
Peripump	ICP-MS06 peripump
Analysts	SP/PP
Solution	10% v/v HCl
Time [s]	Time [min]	weight loss [g]	Momentum mass flow [g/min]	Mass flow [g/min]			Mass flow at sample scale
0	0	-0.037				AVG	0.25288
10	0.166667	-0.0796	0.2556			SD	0.00691549
20	0.333333	-0.124	0.2664			RSD	0.0273469
30	0.5	-0.15	0.156
40	0.666667	-0.2066	0.3396
50	0.833333	-0.2532	0.2796
60	1	-0.2966	0.2604	0.2596
70	1.16667	-0.3411	0.267
80	1.33333	-0.371	0.1794
90	1.5	-0.4129	0.2514
100	1.66667	-0.4548	0.2514
110	1.83333	-0.5024	0.2856
120	2	-0.5483	0.2754	0.2517
130	2.16667	-0.5856	0.2238
140	2.33333	-0.6226	0.222
150	2.5	-0.6625	0.2394
160	2.66667	-0.7132	0.3042
170	2.83333	-0.751	0.2268
180	3	-0.8017	0.3042	0.2534
190	3.16667	-0.8458	0.2646
200	3.33333	-0.8852	0.2364
210	3.5	-0.9427	0.345
220	3.66667	-0.9835	0.2448
230	3.83333	-1.0181	0.2076
240	4	-1.0571	0.234	0.2554
250	4.16667	-1.0881	0.186
260	4.33333	-1.1393	0.3072
270	4.5	-1.1792	0.2394
280	4.66667	-1.221	0.2508
290	4.83333	-1.2647	0.2622
300	5	-1.3027	0.228	0.2456
310	5.16667	-1.3693	0.3996
320	5.33333	-1.4004	0.1866
330	5.5	-1.4262	0.1548
340	5.66667	-1.4943	0.4086
350	5.83333	-1.5216	0.1638
360	6	-1.558	0.2184	0.2553
370	6.16667	-1.6484	0.5424
380	6.33333	-1.6556	0.0432
390	6.5	-1.7177	0.3726
400	6.66667	-1.7332	0.093
410	6.83333	-1.7624	0.1752
420	7	-1.8002	0.2268	0.2422
430	7.16667	-1.8445	0.2658
440	7.33333	-1.8888	0.2658
450	7.5	-1.9352	0.2784
460	7.66667	-1.9795	0.2658
470	7.83333	-2.0166	0.2226
480	8	-2.0651	0.291	0.2649
490	8.16667	-2.0987	0.2016
500	8.33333	-2.1472	0.291
510	8.5	-2.1886	0.2484
520	8.66667	-2.2305	0.2514
530	8.83333	-2.2689	0.2304
540	9	-2.3106	0.2502	0.2455
550	9.16667	-2.3575	0.2814
560	9.33333	-2.4034	0.2754
570	9.5	-2.4417	0.2298
580	9.66667	-2.4858	0.2646
590	9.83333	-2.5184	0.1956
600	10	-2.5658	0.2844	0.2552

## Sheet: FlexCal-H value and u 
	Reference flow	Bias	Standard uncertainty
	502.38	-0.0039	0.0018
	5001.2	-0.0012	0.0018
	49911	0.004	0.0019
	Measured flow [ml min-1]	Corrected flow	Calibration Unceratinty (k=1)	Repeatability	Calibration Unceratinty (k=1)	Repeatability	Combined U
	2.25147	2.26527	0.00179444	0.000867798	0.00406487	0.00196579	0.00451526
	2.02648	2.03849	0.00179443	0.000225901	0.00365794	0.000460496	0.00368681
							0.00199326
							0.0018086

## Sheet: Aw(Hg_e)
	Type (measured/calc)	Term	Anotation	Unit	Value	Uncertainty
							Atomic mass 196Hg	Atomic mass 198Hg	Atomic mass 199Hg	Atomic mass 200Hg	Atomic mass 201Hg	Atomic mass 202Hg	Atomic mass 204Hg	enrHg Atom fraction 196Hg	enrHg Atom fraction 198Hg	enrHg Atom fraction199Hg	enrHg Atom fraction 200Hg	enrHg Atom fraction 201Hg	enrHg Atom fraction 202Hg	enrHg Atom fraction 204Hg
	cert (IUPAC website)	Atomic mass 196Hg	Aw(196Hg)	Da	195.966	2e-05	195.966	195.966	195.966	195.966	195.966	195.966	195.966	195.966	195.966	195.966	195.966	195.966	195.966	195.966
	cert (IUPAC website)	Atomic mass 198Hg	Aw(198Hg)	Da	197.967	3e-06	197.967	197.967	197.967	197.967	197.967	197.967	197.967	197.967	197.967	197.967	197.967	197.967	197.967	197.967
	cert (IUPAC website)	Atomic mass 199Hg	Aw(199Hg)	Da	198.968	4e-06	198.968	198.968	198.968	198.968	198.968	198.968	198.968	198.968	198.968	198.968	198.968	198.968	198.968	198.968
	cert (IUPAC website)	Atomic mass 200Hg	Aw(200Hg)	Da	199.968	4e-06	199.968	199.968	199.968	199.968	199.968	199.968	199.968	199.968	199.968	199.968	199.968	199.968	199.968	199.968
	cert (IUPAC website)	Atomic mass 201Hg	Aw(201Hg)	Da	200.97	5e-06	200.97	200.97	200.97	200.97	200.97	200.97	200.97	200.97	200.97	200.97	200.97	200.97	200.97	200.97
	cert (IUPAC website)	Atomic mass 202Hg	Aw(202Hg)	Da	201.971	5e-06	201.971	201.971	201.971	201.971	201.971	201.971	201.971	201.971	201.971	201.971	201.971	201.971	201.971	201.971
	cert (IUPAC website)	Atomic mass 204Hg	Aw(204Hg)	Da	203.973	3e-06	203.973	203.973	203.973	203.973	203.973	203.973	203.973	203.973	203.973	203.973	203.973	203.973	203.973	203.973
	cert	enrHg Atom fraction 196Hg	A(196Hg)_e	%	0.02	0.02	0.02	0.02	0.02	0.02	0.02	0.02	0.02	0.04	0.02	0.02	0.02	0.02	0.02	0.02
	cert	enrHg Atom fraction 198Hg	A(198Hg)_e	%	1.63	0.02	1.63	1.63	1.63	1.63	1.63	1.63	1.63	1.63	1.65	1.63	1.63	1.63	1.63	1.63
	cert	enrHg Atom fraction199Hg	A(199Hg)_e	%	91.95	0.05	91.95	91.95	91.95	91.95	91.95	91.95	91.95	91.95	91.95	92	91.95	91.95	91.95	91.95
	cert	enrHg Atom fraction 200Hg	A(200Hg)_e	%	4.92	0.03	4.92	4.92	4.92	4.92	4.92	4.92	4.92	4.92	4.92	4.92	4.95	4.92	4.92	4.92
	cert	enrHg Atom fraction 201Hg	A(201Hg)_e	%	0.66	0.01	0.66	0.66	0.66	0.66	0.66	0.66	0.66	0.66	0.66	0.66	0.66	0.67	0.66	0.66
	cert	enrHg Atom fraction 202Hg	A(202Hg)_e	%	0.73	0.01	0.73	0.73	0.73	0.73	0.73	0.73	0.73	0.73	0.73	0.73	0.73	0.73	0.74	0.73
	cert	enrHg Atom fraction 204Hg	A(204Hg)_e	%	0.11	0.01	0.11	0.11	0.11	0.11	0.11	0.11	0.11	0.11	0.11	0.11	0.11	0.11	0.11	0.12
	calculated	199Hg Atomic weight	Aw(Hg_e)	g mol-1	199.081	0.13352	199.081	199.081	199.081	199.081	199.081	199.081	199.081	199.12	199.121	199.18	199.141	199.101	199.101	199.101
							Atomic mass 196Hg	Atomic mass 198Hg	Atomic mass 199Hg	Atomic mass 200Hg	Atomic mass 201Hg	Atomic mass 202Hg	Atomic mass 204Hg	enrHg Atom fraction 196Hg	enrHg Atom fraction 198Hg	enrHg Atom fraction199Hg	enrHg Atom fraction 200Hg	enrHg Atom fraction 201Hg	enrHg Atom fraction 202Hg	enrHg Atom fraction 204Hg
						Squared deviations	1.59999e-17	2.39121e-15	1.35277e-11	3.87302e-14	1.089e-15	1.33225e-15	1.08901e-17	0.0015361	0.00156763	0.00989709	0.00359886	0.000403891	0.000407921	0.000416052
						Budget	8.97481e-16	1.3413e-13	7.58808e-10	2.17249e-12	6.10852e-14	7.47297e-14	6.10858e-16	0.0861646	0.0879332	0.555157	0.201871	0.0226554	0.0228815	0.0233376
	Auto updating table from the website
	Atomic mass (Da)	Isotopic abundance (amount fraction)
	195.965 83(2)	0.0015(1)
	197.966 769(3)	0.1004(3)
	198.968 281(4)	0.1694(12)
	199.968 327(4)	0.2314(9)
	200.970 303(5)	0.1317(9)
	201.970 644(5)	0.2974(13)
	203.973 494(3)	0.0682(4)

## Sheet: Mass fraction 199Hg
Dilution with 3 weighings (bottle-analyte-solvent)
Analyte/Std ID	199Hg Spike (ORNL) SAMD/116 in 20% HNO3 prepared 02/03/2005			Analyst/Lab book		SP1 88-89
Solvent	10 % v/v c.HCl Romil UpA			Date		2022-08-31
Source/Lot no	TBC			Balance		Denver Si-234A, S/N 23408682, Weights NPL 1405
199Hg Dilution 1
Bottle	12.658		Data:	value	repeat	linearity	std. uncert.		n	derivatives	variances
	12.6584		m1	12.6582	0.000120185	9.2376e-06	0.00012054	g	3	-14.6283	3.10917e-06	0.332586	%
	12.6583		m2	12.8665	3.33333e-05	9.2376e-06	3.45897e-05	g	3	14.6892	2.58159e-07	0.027615	%
			m3	62.9111	3.33333e-05	0.000121244	0.000125742	g	3	-0.0608872	5.86157e-11	6.27007e-06	%
			wstock	738.172			7.36306	µg/g		0.00414504	0.000931481	99.6398	%
Bottle +analyte	12.8665									sum	0.000934848
	12.8665		Results	mass (g)	uncert.	unit	rsu (%)
	12.8666		wAnalyte	3.05975	0.0305753	µg/g	0.999273	%
			wAnalyte	3059.75	30.5753	ng/g	0.999273	%
Bottle +analyte+solvent	62.9111		m(Analyte)	0.2083	0.000125404	g	0.0602037	%
	62.9111		m (Solution)	50.2528	0.000174186	g	0.00034662	%
	62.911
199Hg Dilution 2
Bottle	12.6758		Data:	value	repeat	linearity	std. uncert.		n	derivatives	variances
	12.6756		m1	12.6757	5.7735e-05	9.2376e-06	5.84694e-05	g	3	-59.7922	1.22221e-05	0.00326289	%
	12.6757		m2	13.6795	5.7735e-05	9.2376e-06	5.84694e-05	g	3	61.0134	1.27265e-05	0.00339754	%
			m3	62.8245	3.33333e-05	0.000121244	0.000125742	g	3	-1.22127	2.35823e-08	6.29569e-06	%
			wstock	3059.75			30.5753	ng/g		0.0200164	0.374553	99.9933	%
Bottle +analyte	13.6794									sum	0.374578
	13.6795		Results	mass (g)	uncert.	unit	rsu (%)
	13.6796		wAnalyte	61.2453	0.612028	ng/g	0.999307	%
			wAnalyte	61245.3	612.028	pg/g	0.999307	%
Bottle +analyte+solvent	62.8245		m(Analyte)	1.0038	8.26882e-05	g	0.00823751	%
	62.8245		m (Solution)	50.1488	0.000138671	g	0.00027652	%
	62.8246
4 ppb 199Hg
Bottle	12.8958		Data:	value	repeat	linearity	std. uncert.		n	derivatives	variances
	12.8958		m1	12.8958	3.33333e-05	9.2376e-06	3.45897e-05	g	3	-1.14828	1.57756e-09	9.03192e-05	%
	12.8957		m2	16.2892	5.7735e-05	9.2376e-06	5.84694e-05	g	3	1.23244	5.19261e-09	0.000297289	%
			m3	62.5902	3.33333e-05	0.000121244	0.000125742	g	3	-0.0841581	1.11984e-10	6.41131e-06	%
			wstock	61.2453			0.612028	ng/g		0.0682859	0.00174665	99.9996	%
Bottle +analyte	16.2892									sum	0.00174665
	16.2893		Results	mass (g)	uncert.	unit	rsu (%)
	16.2891		wAnalyte	4.18219	0.041793	ng/g	0.999309	%
			wAnalyte	4182.19	41.793	pg/g	0.999309	%
Bottle +analyte+solvent	62.5902		m(Analyte)	3.39343	6.79346e-05	g	0.00200194	%
	62.5903		m (Solution)	49.6945	0.000130413	g	0.00026243	%
	62.5902
