# Supplementary material for: An isotope dilution approach for validating the output of mercury gas generators for mercury pollution monitoring
Source: Royal Society of Chemistry journal article supplement (doi:10.1039/d4ja00373j), 2025-01-01
Supplement: d4ja00373j2.xlsx [file d4ja00373j2.xlsx]

## Sheet: Overview
Flow IDMS Calculation Overview
Date of Calculation	2022-09-16
Date of Analysis	2022-09-15
Analyst(s)	SP
Generator	PSA 10.534 (high-level Hg0)
Detector	ICP-MS06
CV	Cetac HGX-200
Peripump	ICP-MS06 peripump
Mass Flow Meter	Drycal Pro Flexcal (S/N 175689)
Set-up	Panayot's Flow IDMS set-up
Gen Flow Settings	1.5 L/min dilution flow + 1 mL/min reservoir flow
Temp (°C)	35.1
Press(hPa)	1021.6
Dumarey Conc (ng/L) measured flow rate	20.02
Dumarey Conc (ng/L) flow setting	30.3
Measured Conc (ng/L)	31.9903
Measured/Calc Ratio	1.05578

## Sheet: Calculation template
	Type (measured/calc)	Term	Anotation	Unit	Value	Uncertainty
							Spike Mass Flow 199Hg	Volumetric flow (split-flow)	natHg Atomic weight	199Hg Atomic weight	enrHg Atom fraction199Hg	natHg Atom fraction202Hg	Blend IR (202/199)	199Hg IR (202/199)	natHg IR (199/202)
ü	calculated	Spike Mass Flow 199Hg	MFt_e	[pg min-1]	1004.33	17.636	1021.97	1004.33	1004.33	1004.33	1004.33	1004.33	1004.33	1004.33	1004.33
ü	calculated	Volumetric flow (split-flow)	Vf	[sl min-1]	0.234104	0.00574189	0.234104	0.239846	0.234104	0.234104	0.234104	0.234104	0.234104	0.234104	0.234104
ü	cert (IUPAC website)	natHg Atomic weight	Aw(Hg_n)	g mol-1	200.592	0.0015	200.592	200.592	200.594	200.592	200.592	200.592	200.592	200.592	200.592
ü	calculated	199Hg Atomic weight	Aw(Hg_e)	g mol-1	199.081	0.13352	199.081	199.081	199.081	199.215	199.081	199.081	199.081	199.081	199.081
ü	cert	enrHg Atom fraction199Hg	A(199Hg)_e	%	91.95	0.05	91.95	91.95	91.95	91.95	92	91.95	91.95	91.95	91.95
ü	cert (IUPAC website)	natHg Atom fraction202Hg	A(202Hg)_n	%	29.74	0.13	29.74	29.74	29.74	29.74	29.74	29.87	29.74	29.74	29.74
ext file checked ü	measured	Blend IR (202/199)	Rb(202Hg/199Hg)	mol mol-1	1.01614	0.00511522	1.01614	1.01614	1.01614	1.01614	1.01614	1.01614	1.02126	1.01614	1.01614
ü	calculated	199Hg IR (202/199)	Re(202Hg/199Hg)	mol mol-1	0.0079391	0.00010884	0.0079391	0.0079391	0.0079391	0.0079391	0.0079391	0.0079391	0.0079391	0.00804794	0.0079391
ü	calculated	natHg IR (199/202)	Rn(199Hg/202Hg)	mol mol-1	0.569603	0.00474135	0.569603	0.569603	0.569603	0.569603	0.569603	0.569603	0.569603	0.569603	0.574345
	measured by JSI (Dec 2022)	Cold Vapour Efficiency	CVE		0.99652	0.000231084	0.99652	0.99652	0.99652	0.99652	0.99652	0.99652	0.99652	0.99652	0.99652	0.996751
ü	calculated	Generator mass flow (natHg)	MFgen	ng m-3 (=pg/L)	31990.3	1099.3	32552	31224.4	31990.5	31968.8	32007.7	31851	32376.5	31986.8	32360.4
					RSU	0.0343634
							Spike Mass Flow 199Hg	Volumetric flow (split-flow)	natHg Atomic weight	199Hg Atomic weight	enrHg Atom fraction199Hg	natHg Atom fraction202Hg	Blend IR (202/199)	199Hg IR (202/199)	natHg IR (199/202)
						Squared deviations	315559	586516	0.0572257	459.712	302.602	19384.4	149204	11.9267	137012
						Uncertainty Budget	0.261127	0.485346	4.73547e-08	0.000380415	0.000250406	0.0160407	0.123467	9.86944e-06	0.113378
		Term	Anotation	Unit	Value	Uncertainty
ü	calculated (external)	enrHg mass fraction	W(199Hg)	pg g-1	4117.15	41.143
ü	cert	enrHg Atom fraction 196Hg	A(196Hg)_e	%	0.02	0.02
ü	cert	enrHg Atom fraction 198Hg	A(198Hg)_e	%	1.63	0.02
ü	cert	enrHg Atom fraction 200Hg	A(200Hg)_e	%	4.92	0.03
ü	cert	enrHg Atom fraction 201Hg	A(201Hg)_e	%	0.66	0.01
ü	cert	enrHg Atom fraction 202Hg	A(202Hg)_e	%	0.73	0.01
ü	cert	enrHg Atom fraction 204Hg	A(204Hg)_e	%	0.11	0.01
ü	cert (IUPAC website)	natHg Atom fraction199Hg	A(199Hg)_n	%	16.94	0.12
ü	measured	Total Gen flow	F(Gen_tot)	[sl min-1]	2.27104	0.00412957
ü	measured	Waste Gen Flow	F(Gen_exh)	[sl min-1]	2.03694	0.00398949
ü	measured	Peri Pump flow	F(PP)	[g min-1]	0.24479	0.0035341
				ü	(difference)2		Spike Mass Flow 199Hg	Volumetric flow (split-flow)	natHg Atomic weight	199Hg Atomic weight	enrHg Atom fraction199Hg	natHg Atom fraction202Hg	Blend IR (202/199)	199Hg IR (202/199)	natHg IR (199/202)
				ü		199Hg Atomic weight	0	0	0	0.0178276	0	0	0	0	0
				ü		natHg IR (199/202)	0	0	0	0	0	0	0	0	2.24804e-05
				ü		199Hg IR (202/199)	0	0	0	0	0	0	0	1.18462e-08	0
				ü		Spike Mass Flow 199Hg	311.027	0	0	0	0	0	0	0	0
				ü		Valumetric flow (split-flow)	0	3.29693e-05	0	0	0	0	0	0	0
				ü		Generator mass flow (natHg)	315559	586516	0.0572257	459.712	302.602	19384.4	149204	11.9267	137012
				ü	budget		Spike Mass Flow 199Hg	Volumetric flow (split-flow)	natHg Atomic weight	199Hg Atomic weight	enrHg Atom fraction199Hg	natHg Atom fraction202Hg	Blend IR (202/199)	199Hg IR (202/199)	natHg IR (199/202)
				ü		199Hg Atomic weight	0	0	0	1	0	0	0	0	0
				ü		natHg IR (199/202)	0	0	0	0	0	0	0	0	1
				ü		199Hg IR (202/199)	0	0	0	0	0	0	0	1	0
				ü		Spike Mass Flow 199Hg	1	0	0	0	0	0	0	0	0
				ü		Valumetric flow (split-flow)	0	1	0	0	0	0	0	0	0
				ü		Generator mass flow (natHg)	0.261127	0.485346	4.73547e-08	0.000380415	0.000250406	0.0160407	0.123467	9.86944e-06	0.113378
	Auto updating table from the website
	Atomic mass (Da)	Isotopic abundance (amount fraction)
ü	195.965 83(2)	0.0015(1)
ü	197.966 769(3)	0.1004(3)
ü	198.968 281(4)	0.1694(12)
ü	199.968 327(4)	0.2314(9)
ü	200.970 303(5)	0.1317(9)
ü	201.970 644(5)	0.2974(13)
ü	203.973 494(3)	0.0682(4)
			ü
			ü
			ü
			ü
			ü
			ü
			ü
			ü
			ü

## Sheet: Peripump MassFlow
Peripump Massflow Determination
Date	2022-09-02
Peripump	ICP-MS06 peripump
Analysts	SP/PP
Solution	10% v/v HCl
Time [s]	Time [min]	weight loss [g]	Momentum mass flow [g/min]	Mass flow [g/min]			Mass flow at sample scale
0	0	-0.0526				AVG	0.24479
10	0.166667	-0.0945	0.2514			SD	0.0035341
20	0.333333	-0.1362	0.2502			RSD	0.0144373
30	0.5	-0.1759	0.2382
40	0.666667	-0.2156	0.2382
50	0.833333	-0.2535	0.2274
60	1	-0.2943	0.2448	0.2417
70	1.16667	-0.335	0.2442
80	1.33333	-0.3751	0.2406
90	1.5	-0.4143	0.2352
100	1.66667	-0.4563	0.252
110	1.83333	-0.4946	0.2298
120	2	-0.5364	0.2508	0.2421
130	2.16667	-0.5757	0.2358
140	2.33333	-0.6151	0.2364
150	2.5	-0.657	0.2514
160	2.66667	-0.6959	0.2334
170	2.83333	-0.7385	0.2556
180	3	-0.7818	0.2598	0.2454
190	3.16667	-0.8178	0.216
200	3.33333	-0.8604	0.2556
210	3.5	-0.9017	0.2478
220	3.66667	-0.9401	0.2304
230	3.83333	-0.9817	0.2496
240	4	-1.0231	0.2484	0.2413
250	4.16667	-1.0617	0.2316
260	4.33333	-1.104	0.2538
270	4.5	-1.1429	0.2334
280	4.66667	-1.1827	0.2388
290	4.83333	-1.2261	0.2604
300	5	-1.2688	0.2562	0.2457
310	5.16667	-1.3047	0.2154
320	5.33333	-1.3483	0.2616
330	5.5	-1.3888	0.243
340	5.66667	-1.4303	0.249
350	5.83333	-1.4698	0.237
360	6	-1.5085	0.2322	0.2397
370	6.16667	-1.5518	0.2598
380	6.33333	-1.595	0.2592
390	6.5	-1.6355	0.243
400	6.66667	-1.6773	0.2508
410	6.83333	-1.7157	0.2304
420	7	-1.7571	0.2484	0.2486
430	7.16667	-1.7996	0.255
440	7.33333	-1.8382	0.2316
450	7.5	-1.8814	0.2592
460	7.66667	-1.9224	0.246
470	7.83333	-1.9628	0.2424
480	8	-2.0051	0.2538	0.248
490	8.16667	-2.0466	0.249
500	8.33333	-2.0845	0.2274
510	8.5	-2.1293	0.2688
520	8.66667	-2.1701	0.2448
530	8.83333	-2.2111	0.246
540	9	-2.2501	0.234	0.245
550	9.16667	-2.2916	0.249
560	9.33333	-2.3349	0.2598
570	9.5	-2.3761	0.2472
580	9.66667	-2.4171	0.246
590	9.83333	-2.4583	0.2472
600	10	-2.5005	0.2532	0.2504

## Sheet: FlexCal-H value and u 
	Reference flow	Bias	Standard uncertainty
	502.38	-0.0039	0.0018
	5001.2	-0.0012	0.0018
	49911	0.004	0.0019
	Measured flow [ml min-1]	Corrected flow	Calibration Unceratinty (k=1)	Repeatability	Calibration Unceratinty (k=1)	Repeatability	Combined U
	2.2572	2.27104	0.00179444	0.000293997	0.00407524	0.00066768	0.00412957
	2.02494	2.03694	0.00179443	0.000784863	0.00365515	0.00159872	0.00398949
							0.00181836
							0.00195857

## Sheet: Aw(Hg_e)
	Type (measured/calc)	Term	Anotation	Unit	Value	Uncertainty
							Atomic mass 196Hg	Atomic mass 198Hg	Atomic mass 199Hg	Atomic mass 200Hg	Atomic mass 201Hg	Atomic mass 202Hg	Atomic mass 204Hg	enrHg Atom fraction 196Hg	enrHg Atom fraction 198Hg	enrHg Atom fraction199Hg	enrHg Atom fraction 200Hg	enrHg Atom fraction 201Hg	enrHg Atom fraction 202Hg	enrHg Atom fraction 204Hg
	cert (IUPAC website)	Atomic mass 196Hg	Aw(196Hg)	Da	195.966	2e-05	195.966	195.966	195.966	195.966	195.966	195.966	195.966	195.966	195.966	195.966	195.966	195.966	195.966	195.966
	cert (IUPAC website)	Atomic mass 198Hg	Aw(198Hg)	Da	197.967	3e-06	197.967	197.967	197.967	197.967	197.967	197.967	197.967	197.967	197.967	197.967	197.967	197.967	197.967	197.967
	cert (IUPAC website)	Atomic mass 199Hg	Aw(199Hg)	Da	198.968	4e-06	198.968	198.968	198.968	198.968	198.968	198.968	198.968	198.968	198.968	198.968	198.968	198.968	198.968	198.968
	cert (IUPAC website)	Atomic mass 200Hg	Aw(200Hg)	Da	199.968	4e-06	199.968	199.968	199.968	199.968	199.968	199.968	199.968	199.968	199.968	199.968	199.968	199.968	199.968	199.968
	cert (IUPAC website)	Atomic mass 201Hg	Aw(201Hg)	Da	200.97	5e-06	200.97	200.97	200.97	200.97	200.97	200.97	200.97	200.97	200.97	200.97	200.97	200.97	200.97	200.97
	cert (IUPAC website)	Atomic mass 202Hg	Aw(202Hg)	Da	201.971	5e-06	201.971	201.971	201.971	201.971	201.971	201.971	201.971	201.971	201.971	201.971	201.971	201.971	201.971	201.971
	cert (IUPAC website)	Atomic mass 204Hg	Aw(204Hg)	Da	203.973	3e-06	203.973	203.973	203.973	203.973	203.973	203.973	203.973	203.973	203.973	203.973	203.973	203.973	203.973	203.973
	cert	enrHg Atom fraction 196Hg	A(196Hg)_e	%	0.02	0.02	0.02	0.02	0.02	0.02	0.02	0.02	0.02	0.04	0.02	0.02	0.02	0.02	0.02	0.02
	cert	enrHg Atom fraction 198Hg	A(198Hg)_e	%	1.63	0.02	1.63	1.63	1.63	1.63	1.63	1.63	1.63	1.63	1.65	1.63	1.63	1.63	1.63	1.63
	cert	enrHg Atom fraction199Hg	A(199Hg)_e	%	91.95	0.05	91.95	91.95	91.95	91.95	91.95	91.95	91.95	91.95	91.95	92	91.95	91.95	91.95	91.95
	cert	enrHg Atom fraction 200Hg	A(200Hg)_e	%	4.92	0.03	4.92	4.92	4.92	4.92	4.92	4.92	4.92	4.92	4.92	4.92	4.95	4.92	4.92	4.92
	cert	enrHg Atom fraction 201Hg	A(201Hg)_e	%	0.66	0.01	0.66	0.66	0.66	0.66	0.66	0.66	0.66	0.66	0.66	0.66	0.66	0.67	0.66	0.66
	cert	enrHg Atom fraction 202Hg	A(202Hg)_e	%	0.73	0.01	0.73	0.73	0.73	0.73	0.73	0.73	0.73	0.73	0.73	0.73	0.73	0.73	0.74	0.73
	cert	enrHg Atom fraction 204Hg	A(204Hg)_e	%	0.11	0.01	0.11	0.11	0.11	0.11	0.11	0.11	0.11	0.11	0.11	0.11	0.11	0.11	0.11	0.12
	calculated	199Hg Atomic weight	Aw(Hg_e)	g mol-1	199.081	0.13352	199.081	199.081	199.081	199.081	199.081	199.081	199.081	199.12	199.121	199.18	199.141	199.101	199.101	199.101
							Atomic mass 196Hg	Atomic mass 198Hg	Atomic mass 199Hg	Atomic mass 200Hg	Atomic mass 201Hg	Atomic mass 202Hg	Atomic mass 204Hg	enrHg Atom fraction 196Hg	enrHg Atom fraction 198Hg	enrHg Atom fraction199Hg	enrHg Atom fraction 200Hg	enrHg Atom fraction 201Hg	enrHg Atom fraction 202Hg	enrHg Atom fraction 204Hg
						Squared deviations	1.59999e-17	2.39121e-15	1.35277e-11	3.87302e-14	1.089e-15	1.33225e-15	1.08901e-17	0.0015361	0.00156763	0.00989709	0.00359886	0.000403891	0.000407921	0.000416052
						Budget	8.97481e-16	1.3413e-13	7.58808e-10	2.17249e-12	6.10852e-14	7.47297e-14	6.10858e-16	0.0861646	0.0879332	0.555157	0.201871	0.0226554	0.0228815	0.0233376
	Auto updating table from the website
	Atomic mass (Da)	Isotopic abundance (amount fraction)
	195.965 83(2)	0.0015(1)
	197.966 769(3)	0.1004(3)
	198.968 281(4)	0.1694(12)
	199.968 327(4)	0.2314(9)
	200.970 303(5)	0.1317(9)
	201.970 644(5)	0.2974(13)
	203.973 494(3)	0.0682(4)

## Sheet: Mass fraction 199Hg
Dilution with 3 weighings (bottle-analyte-solvent)
Analyte/Std ID	199Hg Spike (ORNL) SAMD/116 in 20% HNO3 prepared 02/03/2005			Analyst/Lab book		SP1 88, 92
Solvent	10 % v/v c.HCl Romil UpA			Date		2022-09-14
Source/Lot no	TBC			Balance		Ohaus Explorer EX224 S/N C212744832
199Hg Dilution 1 - 31/08/22 SP, p. 88
Bottle	12.658		Data:	value	repeat	linearity	std. uncert.		n	derivatives	variances
	12.6584		m1	12.6582	0.000120185	9.2376e-06	0.00012054	g	3	-14.6283	3.10917e-06	0.332586	%
	12.6583		m2	12.8665	3.33333e-05	9.2376e-06	3.45897e-05	g	3	14.6892	2.58159e-07	0.027615	%
			m3	62.9111	3.33333e-05	0.000121244	0.000125742	g	3	-0.0608872	5.86157e-11	6.27007e-06	%
			wstock	738.172			7.36306	µg/g		0.00414504	0.000931481	99.6398	%
Bottle +analyte	12.8665									sum	0.000934848
	12.8665		Results	mass (g)	uncert.	unit	rsu (%)
	12.8666		wAnalyte	3.05975	0.0305753	µg/g	0.999273	%
			wAnalyte	3059.75	30.5753	ng/g	0.999273	%
Bottle +analyte+solvent	62.9111		m(Analyte)	0.2083	0.000125404	g	0.0602037	%
	62.9111		m (Solution)	50.2528	0.000174186	g	0.00034662	%
	62.911
199Hg Dilution 2 - 31/08/22 SP p. 88
Bottle	12.6758		Data:	value	repeat	linearity	std. uncert.		n	derivatives	variances
	12.6756		m1	12.6757	5.7735e-05	9.2376e-06	5.84694e-05	g	3	-59.7922	1.22221e-05	0.00326289	%
	12.6757		m2	13.6795	5.7735e-05	9.2376e-06	5.84694e-05	g	3	61.0134	1.27265e-05	0.00339754	%
			m3	62.8245	3.33333e-05	0.000121244	0.000125742	g	3	-1.22127	2.35823e-08	6.29569e-06	%
			wstock	3059.75			30.5753	ng/g		0.0200164	0.374553	99.9933	%
Bottle +analyte	13.6794									sum	0.374578
	13.6795		Results	mass (g)	uncert.	unit	rsu (%)
	13.6796		wAnalyte	61.2453	0.612028	ng/g	0.999307	%
			wAnalyte	61245.3	612.028	pg/g	0.999307	%
Bottle +analyte+solvent	62.8245		m(Analyte)	1.0038	8.26882e-05	g	0.00823751	%
	62.8245		m (Solution)	50.1488	0.000138671	g	0.00027652	%
	62.8246
4 ppb 199Hg - 15/09/22 SP p. 92
Bottle	12.6888		Data:	value	repeat	linearity	std. uncert.		n	derivatives	variances
	12.6888		m1	12.6888	3.33333e-05	9.2376e-06	3.45897e-05	g	3	-1.14604	1.57142e-09	9.28325e-05	%
	12.6889		m2	16.0398	3.33333e-05	9.2376e-06	3.45897e-05	g	3	1.22863	1.80608e-09	0.000106695	%
			m3	62.5371	0	0.000121244	0.000121244	g	3	-0.0825937	1.00279e-10	5.92405e-06	%
			wstock	61.2453			0.612028	ng/g		0.067224	0.00169274	99.9998	%
Bottle +analyte	16.0398									sum	0.00169275
	16.0398		Results	mass (g)	uncert.	unit	rsu (%)
	16.0399		wAnalyte	4.11715	0.041143	ng/g	0.999308	%
			wAnalyte	4117.15	41.143	pg/g	0.999308	%
Bottle +analyte+solvent	62.5371		m(Analyte)	3.351	4.89172e-05	g	0.00145978	%
	62.5371		m (Solution)	49.8483	0.000126081	g	0.00025293	%
	62.5371
