# Supplementary material for: An isotope dilution approach for validating the output of mercury gas generators for mercury pollution monitoring
Source: Royal Society of Chemistry journal article supplement (doi:10.1039/d4ja00373j), 2025-01-01
Supplement: d4ja00373j4.xlsx [file d4ja00373j4.xlsx]

## Sheet: Overview
Flow IDMS Calculation Overview
Date of Calculation	2023-05-04
Date of Analysis	2023-04-26
Analyst(s)	SP
Generator	PSA 10.532 fixed flow HgCl2
Detector	ICP-MS06
CV	Cetac HGX-200
Peripump	ICP-MS06 peripump
Mass Flow Meter	Drycal Pro Flexcal (S/N 175689)
Set-up	Panayot's Flow IDMS set-up
Gen Flow Settings	14.8 L/min dil + 9 mL/min res
Temp (°C)	40.1
Press(hPa)	1173

## Sheet: Calculation template
	Type (measured/calc)	Term	Anotation	Unit	Value	Uncertainty
							Spike Mass Flow 199Hg	Volumetric flow (split-flow)	natHg Atomic weight	199Hg Atomic weight	enrHg Atom fraction199Hg	natHg Atom fraction202Hg	Blend IR (202/199)	199Hg IR (202/199)	natHg IR (199/202)
ü	calculated	Spike Mass Flow 199Hg	MFt_e	[pg min-1]	140.094	3.30016	143.394	140.094	140.094	140.094	140.094	140.094	140.094	140.094	140.094
ü	calculated	Volumetric flow (split-flow)	Vf	[sl min-1]	0.204	0.00408	0.204	0.20808	0.204	0.204	0.204	0.204	0.204	0.204	0.204
ü	cert (IUPAC website)	natHg Atomic weight	Aw(Hg_n)	g mol-1	200.592	0.0015	200.592	200.592	200.594	200.592	200.592	200.592	200.592	200.592	200.592
ü	calculated	199Hg Atomic weight	Aw(Hg_e)	g mol-1	199.081	0.13352	199.081	199.081	199.081	199.215	199.081	199.081	199.081	199.081	199.081
ü	cert	enrHg Atom fraction199Hg	A(199Hg)_e	%	91.95	0.05	91.95	91.95	91.95	91.95	92	91.95	91.95	91.95	91.95
ü	cert (IUPAC website)	natHg Atom fraction202Hg	A(202Hg)_n	%	29.74	0.13	29.74	29.74	29.74	29.74	29.74	29.87	29.74	29.74	29.74
ext file checked ü	measured	Blend IR (202/199)	Rb(202Hg/199Hg)	mol mol-1	0.94128	0.00211738	0.94128	0.94128	0.94128	0.94128	0.94128	0.94128	0.943397	0.94128	0.94128
ü	calculated	199Hg IR (202/199)	Re(202Hg/199Hg)	mol mol-1	0.0079391	0.00010884	0.0079391	0.0079391	0.0079391	0.0079391	0.0079391	0.0079391	0.0079391	0.00804794	0.0079391
ü	calculated	natHg IR (199/202)	Rn(199Hg/202Hg)	mol mol-1	0.569603	0.00474135	0.569603	0.569603	0.569603	0.569603	0.569603	0.569603	0.569603	0.569603	0.574345
ü	calculated	Generator mass flow (natHg)	MFgen	ng m-3 (=pg/L)	4304.8	141.293	4406.21	4220.39	4304.83	4301.92	4307.14	4286.07	4325.81	4304.3	4346.62
					RSU	0.0328222
							Spike Mass Flow 199Hg	Volumetric flow (split-flow)	natHg Atomic weight	199Hg Atomic weight	enrHg Atom fraction199Hg	natHg Atom fraction202Hg	Blend IR (202/199)	199Hg IR (202/199)	natHg IR (199/202)
						Squared deviations	10283.3	7124.69	0.00103624	8.32446	5.47952	351.012	441.576	0.252003	1749.05
						Uncertainty Budget	0.515101	0.356882	5.19063e-08	0.000416979	0.000274474	0.0175825	0.0221189	1.26231e-05	0.0876112
		Term	Anotation	Unit	Value	Uncertainty
ü	calculated (external)	enrHg mass fraction	W(199Hg)	pg g-1	514.183	6.19496
ü	cert	enrHg Atom fraction 196Hg	A(196Hg)_e	%	0.02	0.02
ü	cert	enrHg Atom fraction 198Hg	A(198Hg)_e	%	1.63	0.02
ü	cert	enrHg Atom fraction 200Hg	A(200Hg)_e	%	4.92	0.03
ü	cert	enrHg Atom fraction 201Hg	A(201Hg)_e	%	0.66	0.01
ü	cert	enrHg Atom fraction 202Hg	A(202Hg)_e	%	0.73	0.01
ü	cert	enrHg Atom fraction 204Hg	A(204Hg)_e	%	0.11	0.01
ü	cert (IUPAC website)	natHg Atom fraction199Hg	A(199Hg)_n	%	16.94	0.12
ü	measured	Total Gen flow	F(Gen_tot)	[sl min-1]	13.4497	0.0242495
ü	measured	Waste Gen Flow	F(Gen_exh)	[sl min-1]	13.1831	0.0267119
ü	measured	Peri Pump flow	F(PP)	[g min-1]	0.27246	0.00551527
				ü	(difference)2		Spike Mass Flow 199Hg	Volumetric flow (split-flow)	natHg Atomic weight	199Hg Atomic weight	enrHg Atom fraction199Hg	natHg Atom fraction202Hg	Blend IR (202/199)	199Hg IR (202/199)	natHg IR (199/202)
				ü		199Hg Atomic weight	0	0	0	0.0178276	0	0	0	0	0
				ü		natHg IR (199/202)	0	0	0	0	0	0	0	0	2.24804e-05
				ü		199Hg IR (202/199)	0	0	0	0	0	0	0	1.18462e-08	0
				ü		Spike Mass Flow 199Hg	10.891	0	0	0	0	0	0	0	0
				ü		Valumetric flow (split-flow)	0	1.66464e-05	0	0	0	0	0	0	0
				ü		Generator mass flow (natHg)	10283.3	7124.69	0.00103624	8.32446	5.47952	351.012	441.576	0.252003	1749.05
				ü	budget		Spike Mass Flow 199Hg	Volumetric flow (split-flow)	natHg Atomic weight	199Hg Atomic weight	enrHg Atom fraction199Hg	natHg Atom fraction202Hg	Blend IR (202/199)	199Hg IR (202/199)	natHg IR (199/202)
				ü		199Hg Atomic weight	0	0	0	1	0	0	0	0	0
				ü		natHg IR (199/202)	0	0	0	0	0	0	0	0	1
				ü		199Hg IR (202/199)	0	0	0	0	0	0	0	1	0
				ü		Spike Mass Flow 199Hg	1	0	0	0	0	0	0	0	0
				ü		Valumetric flow (split-flow)	0	1	0	0	0	0	0	0	0
				ü		Generator mass flow (natHg)	0.515101	0.356882	5.19063e-08	0.000416979	0.000274474	0.0175825	0.0221189	1.26231e-05	0.0876112
	Auto updating table from the website
	Atomic mass (Da)	Isotopic abundance (amount fraction)
ü	195.965 83(2)	0.0015(1)
ü	197.966 769(3)	0.1004(3)
ü	198.968 281(4)	0.1694(12)
ü	199.968 327(4)	0.2314(9)
ü	200.970 303(5)	0.1317(9)
ü	201.970 644(5)	0.2974(13)
ü	203.973 494(3)	0.0682(4)
			ü
			ü
			ü
			ü
			ü
			ü
			ü
			ü
			ü

## Sheet: Peripump MassFlow
Peripump Massflow Determination
Date	2023-04-26
Peripump	ICP-MS06 peripump
Analysts	SP
Solution	199Hg in 10% v/v HCl
Time [s]	Time [min]	weight loss [g]	Momentum mass flow [g/min]	Mass flow [g/min]			Mass flow at sample scale
0	0	-0.2637				AVG	0.27246
10	0.166667	-0.3081	0.2664			SD	0.00551527
20	0.333333	-0.3518	0.2622			RSD	0.0202425
30	0.5	-0.3956	0.2628
40	0.666667	-0.44	0.2664
50	0.833333	-0.4836	0.2616
60	1	-0.5275	0.2634	0.2638
70	1.16667	-0.5733	0.2748
80	1.33333	-0.6161	0.2568
90	1.5	-0.6601	0.264
100	1.66667	-0.7048	0.2682
110	1.83333	-0.7489	0.2646
120	2	-0.7944	0.273	0.2669
130	2.16667	-0.8377	0.2598
140	2.33333	-0.8828	0.2706
150	2.5	-0.9292	0.2784
160	2.66667	-0.974	0.2688
170	2.83333	-1.0185	0.267
180	3	-1.0609	0.2544	0.2665
190	3.16667	-1.1057	0.2688
200	3.33333	-1.1511	0.2724
210	3.5	-1.1983	0.2832
220	3.66667	-1.2415	0.2592
230	3.83333	-1.2861	0.2676
240	4	-1.3298	0.2622	0.2689
250	4.16667	-1.3769	0.2826
260	4.33333	-1.4235	0.2796
270	4.5	-1.47	0.279
280	4.66667	-1.5126	0.2556
290	4.83333	-1.5576	0.27
300	5	-1.6045	0.2814	0.2747
310	5.16667	-1.6504	0.2754
320	5.33333	-1.6948	0.2664
330	5.5	-1.7418	0.282
340	5.66667	-1.7864	0.2676
350	5.83333	-1.8336	0.2832
360	6	-1.8781	0.267	0.2736
370	6.16667	-1.926	0.2874
380	6.33333	-1.9692	0.2592
390	6.5	-2.0152	0.276
400	6.66667	-2.0618	0.2796
410	6.83333	-2.1074	0.2736
420	7	-2.1543	0.2814	0.2762
430	7.16667	-2.201	0.2802
440	7.33333	-2.2483	0.2838
450	7.5	-2.2934	0.2706
460	7.66667	-2.3387	0.2718
470	7.83333	-2.3838	0.2706
480	8	-2.4313	0.285	0.277
490	8.16667	-2.476	0.2682
500	8.33333	-2.5225	0.279
510	8.5	-2.5679	0.2724
520	8.66667	-2.6142	0.2778
530	8.83333	-2.6635	0.2958
540	9	-2.7115	0.288	0.2802
550	9.16667	-2.7594	0.2874
560	9.33333	-2.8082	0.2928
570	9.5	-2.8508	0.2556
580	9.66667	-2.895	0.2652
590	9.83333	-2.9414	0.2784
600	10	-2.9883	0.2814	0.2768

## Sheet: FlexCal-H value and u 
	Reference flow	Bias	Standard uncertainty
	502.38	-0.0039	0.0018
	5001.2	-0.0012	0.0018
	49911	0.004	0.0019
	Measured flow [ml min-1]	Corrected flow	Calibration Unceratinty (k=1)	Repeatability	Calibration Unceratinty (k=1)	Repeatability	Combined U
	13.4056	13.4497	0.00179446	0.000175	0.024135	0.0023537	0.0242495
	13.1393	13.1831	0.00179446	0.000941	0.0236565	0.0124053	0.0267119
							0.00180297
							0.00202622

## Sheet: Aw(Hg_e)
	Type (measured/calc)	Term	Anotation	Unit	Value	Uncertainty
							Atomic mass 196Hg	Atomic mass 198Hg	Atomic mass 199Hg	Atomic mass 200Hg	Atomic mass 201Hg	Atomic mass 202Hg	Atomic mass 204Hg	enrHg Atom fraction 196Hg	enrHg Atom fraction 198Hg	enrHg Atom fraction199Hg	enrHg Atom fraction 200Hg	enrHg Atom fraction 201Hg	enrHg Atom fraction 202Hg	enrHg Atom fraction 204Hg
	cert (IUPAC website)	Atomic mass 196Hg	Aw(196Hg)	Da	195.966	2e-05	195.966	195.966	195.966	195.966	195.966	195.966	195.966	195.966	195.966	195.966	195.966	195.966	195.966	195.966
	cert (IUPAC website)	Atomic mass 198Hg	Aw(198Hg)	Da	197.967	3e-06	197.967	197.967	197.967	197.967	197.967	197.967	197.967	197.967	197.967	197.967	197.967	197.967	197.967	197.967
	cert (IUPAC website)	Atomic mass 199Hg	Aw(199Hg)	Da	198.968	4e-06	198.968	198.968	198.968	198.968	198.968	198.968	198.968	198.968	198.968	198.968	198.968	198.968	198.968	198.968
	cert (IUPAC website)	Atomic mass 200Hg	Aw(200Hg)	Da	199.968	4e-06	199.968	199.968	199.968	199.968	199.968	199.968	199.968	199.968	199.968	199.968	199.968	199.968	199.968	199.968
	cert (IUPAC website)	Atomic mass 201Hg	Aw(201Hg)	Da	200.97	5e-06	200.97	200.97	200.97	200.97	200.97	200.97	200.97	200.97	200.97	200.97	200.97	200.97	200.97	200.97
	cert (IUPAC website)	Atomic mass 202Hg	Aw(202Hg)	Da	201.971	5e-06	201.971	201.971	201.971	201.971	201.971	201.971	201.971	201.971	201.971	201.971	201.971	201.971	201.971	201.971
	cert (IUPAC website)	Atomic mass 204Hg	Aw(204Hg)	Da	203.973	3e-06	203.973	203.973	203.973	203.973	203.973	203.973	203.973	203.973	203.973	203.973	203.973	203.973	203.973	203.973
	cert	enrHg Atom fraction 196Hg	A(196Hg)_e	%	0.02	0.02	0.02	0.02	0.02	0.02	0.02	0.02	0.02	0.04	0.02	0.02	0.02	0.02	0.02	0.02
	cert	enrHg Atom fraction 198Hg	A(198Hg)_e	%	1.63	0.02	1.63	1.63	1.63	1.63	1.63	1.63	1.63	1.63	1.65	1.63	1.63	1.63	1.63	1.63
	cert	enrHg Atom fraction199Hg	A(199Hg)_e	%	91.95	0.05	91.95	91.95	91.95	91.95	91.95	91.95	91.95	91.95	91.95	92	91.95	91.95	91.95	91.95
	cert	enrHg Atom fraction 200Hg	A(200Hg)_e	%	4.92	0.03	4.92	4.92	4.92	4.92	4.92	4.92	4.92	4.92	4.92	4.92	4.95	4.92	4.92	4.92
	cert	enrHg Atom fraction 201Hg	A(201Hg)_e	%	0.66	0.01	0.66	0.66	0.66	0.66	0.66	0.66	0.66	0.66	0.66	0.66	0.66	0.67	0.66	0.66
	cert	enrHg Atom fraction 202Hg	A(202Hg)_e	%	0.73	0.01	0.73	0.73	0.73	0.73	0.73	0.73	0.73	0.73	0.73	0.73	0.73	0.73	0.74	0.73
	cert	enrHg Atom fraction 204Hg	A(204Hg)_e	%	0.11	0.01	0.11	0.11	0.11	0.11	0.11	0.11	0.11	0.11	0.11	0.11	0.11	0.11	0.11	0.12
	calculated	199Hg Atomic weight	Aw(Hg_e)	g mol-1	199.081	0.13352	199.081	199.081	199.081	199.081	199.081	199.081	199.081	199.12	199.121	199.18	199.141	199.101	199.101	199.101
							Atomic mass 196Hg	Atomic mass 198Hg	Atomic mass 199Hg	Atomic mass 200Hg	Atomic mass 201Hg	Atomic mass 202Hg	Atomic mass 204Hg	enrHg Atom fraction 196Hg	enrHg Atom fraction 198Hg	enrHg Atom fraction199Hg	enrHg Atom fraction 200Hg	enrHg Atom fraction 201Hg	enrHg Atom fraction 202Hg	enrHg Atom fraction 204Hg
						Squared deviations	1.59999e-17	2.39121e-15	1.35277e-11	3.87302e-14	1.089e-15	1.33225e-15	1.08901e-17	0.0015361	0.00156763	0.00989709	0.00359886	0.000403891	0.000407921	0.000416052
						Budget	8.97481e-16	1.3413e-13	7.58808e-10	2.17249e-12	6.10852e-14	7.47297e-14	6.10858e-16	0.0861646	0.0879332	0.555157	0.201871	0.0226554	0.0228815	0.0233376
	Auto updating table from the website
	Atomic mass (Da)	Isotopic abundance (amount fraction)
	195.965 83(2)	0.0015(1)
	197.966 769(3)	0.1004(3)
	198.968 281(4)	0.1694(12)
	199.968 327(4)	0.2314(9)
	200.970 303(5)	0.1317(9)
	201.970 644(5)	0.2974(13)
	203.973 494(3)	0.0682(4)

## Sheet: Mass fraction 199Hg
Dilution with 3 weighings (bottle-analyte-solvent)
Analyte/Std ID	199Hg Spike (ORNL) SAMD/116 in 20% HNO3 prepared 02/03/2005			Analyst/Lab book		SP1 88, 92
Solvent	10 % v/v c.HCl Romil UpA			Date		2022-09-14
Source/Lot no	TBC			Balance		Ohaus Explorer EX224 S/N C212744832
199Hg Dilution 1 - 25/04/2023 SP1 pg. 122
Bottle	12.5139		Data:	value	repeat	linearity	std. uncert.		n	derivatives	variances
	12.5141		m1	12.5138	0.000208167	9.2376e-06	0.000208371	g	3	-14.6172	9.27693e-06	0.979531	%
	12.5134		m2	12.7224	0.000152753	9.2376e-06	0.000153032	g	3	14.6781	5.04545e-06	0.532739	%
			m3	62.8046	0.000208167	0.000121244	0.000240901	g	3	-0.0608828	2.15113e-10	2.27133e-05	%
			wstock	738.172			7.36306	µg/g		0.00414788	0.000932756	98.4877	%
Bottle +analyte	12.7226									sum	0.000947078
	12.7225		Results	mass (g)	uncert.	unit	rsu (%)
	12.7221		wAnalyte	3.06185	0.0307746	µg/g	1.0051	%
			wAnalyte	3061.85	30.7746	ng/g	1.0051	%
Bottle +analyte+solvent	62.8049		m(Analyte)	0.2086	0.000258529	g	0.123935	%
	62.8047		m (Solution)	50.2908	0.000318515	g	0.000633347	%
	62.8042
199Hg Dilution 2 - 25/04/2023 SP1 pg. 122
Bottle	12.7236		Data:	value	repeat	linearity	std. uncert.		n	derivatives	variances
	12.7236		m1	12.7237	6.66667e-05	9.2376e-06	6.73036e-05	g	3	-59.6858	1.61369e-05	0.00282432	%
	12.7238		m2	13.7537	0	9.2376e-06	9.2376e-06	g	3	60.9349	3.16848e-07	5.54557e-05	%
			m3	62.9715	0.333333	0.000121244	0.333333	g	3	-1.24911	0.173364	30.3426	%
			wstock	3061.85			30.7746	ng/g		0.0204991	0.397974	69.6545	%
Bottle +analyte	13.7537									sum	0.571354
	13.7537		Results	mass (g)	uncert.	unit	rsu (%)
	13.7537		wAnalyte	62.765	0.75588	ng/g	1.2043	%
			wAnalyte	62765	755.88	pg/g	1.2043	%
Bottle +analyte+solvent	62.3048		m(Analyte)	1.03003	6.79346e-05	g	0.00659538	%
	63.3048		m (Solution)	50.2478	0.333333	g	0.663379	%
	63.3048
0.5 ppb 199Hg - 25/04/2023 SP1 pg. 123
Bottle	12.552		Data:	value	repeat	linearity	std. uncert.		n	derivatives	variances
	12.5518		m1	12.552	0.00011547	9.2376e-06	0.000115839	g	3	-1.23759	2.05525e-08	0.0535535	%
	12.5522		m2	12.9641	8.81917e-05	9.2376e-06	8.86742e-05	g	3	1.24781	1.22432e-08	0.031902	%
			m3	62.8519	0.000133333	0.000121244	0.000180216	g	3	-0.0102223	3.3938e-12	8.84321e-06	%
			wstock	62.765			0.75588	ng/g		0.00819219	3.83447e-05	99.9145	%
Bottle +analyte	12.9639									sum	3.83775e-05
	12.9641		Results	mass (g)	uncert.	unit	rsu (%)
	12.9642		wAnalyte	0.514183	0.00619496	ng/g	1.20482	%
			wAnalyte	514.183	6.19496	pg/g	1.20482	%
Bottle +analyte+solvent	62.8522		m(Analyte)	0.412067	0.000145883	g	0.0354027	%
	62.8518		m (Solution)	50.2999	0.000214235	g	0.000425914	%
	62.8518
